# Supplementary material
Source: publisher figshare collection journal article supplement (https://tandf.figshare.com/articles/dataset/_/9103811)
Supplement: Supplementary file 2 [file 5]

# Statistical Topology and the Random Interstellar Medium

## Supplementary Material

### Contents

|   |                                                                                                                     |    |
|---|---------------------------------------------------------------------------------------------------------------------|----|
| 1 | Additional plots                                                                                                    | 1  |
| 2 | Further simulation results                                                                                          | 6  |
| 3 | Comparison of observed component and hole counts with GRF expectations under different trend and covariance methods | 8  |
| 4 | P-values for comparisons between regions under different trend models                                               | 12 |

### 1 Additional plots

Figure 1 illustrates the data used in Section 1 of the main paper to describe level sets and Betti numbers.

Figures 2 and 3 show persistence diagrams and 90% convex peels for the three GASS data regions, after trend removal and marginal transformation.

Figure 4 provides an example simulation for each of the 5 models of Section 4.1.

(a)

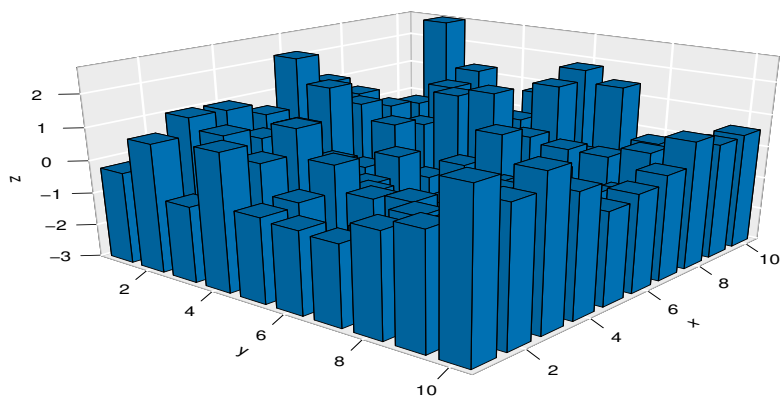

(b)

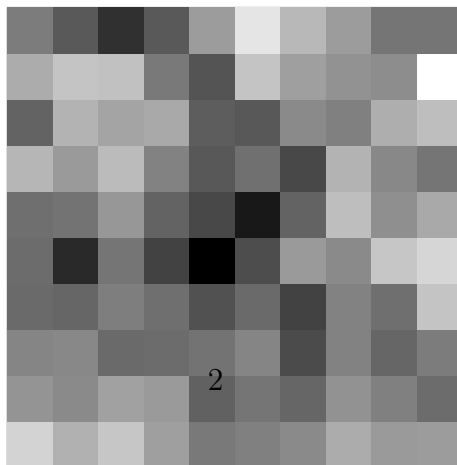

Figure 1: Two representations of the illustrative data used in Section 2.1 of the main paper

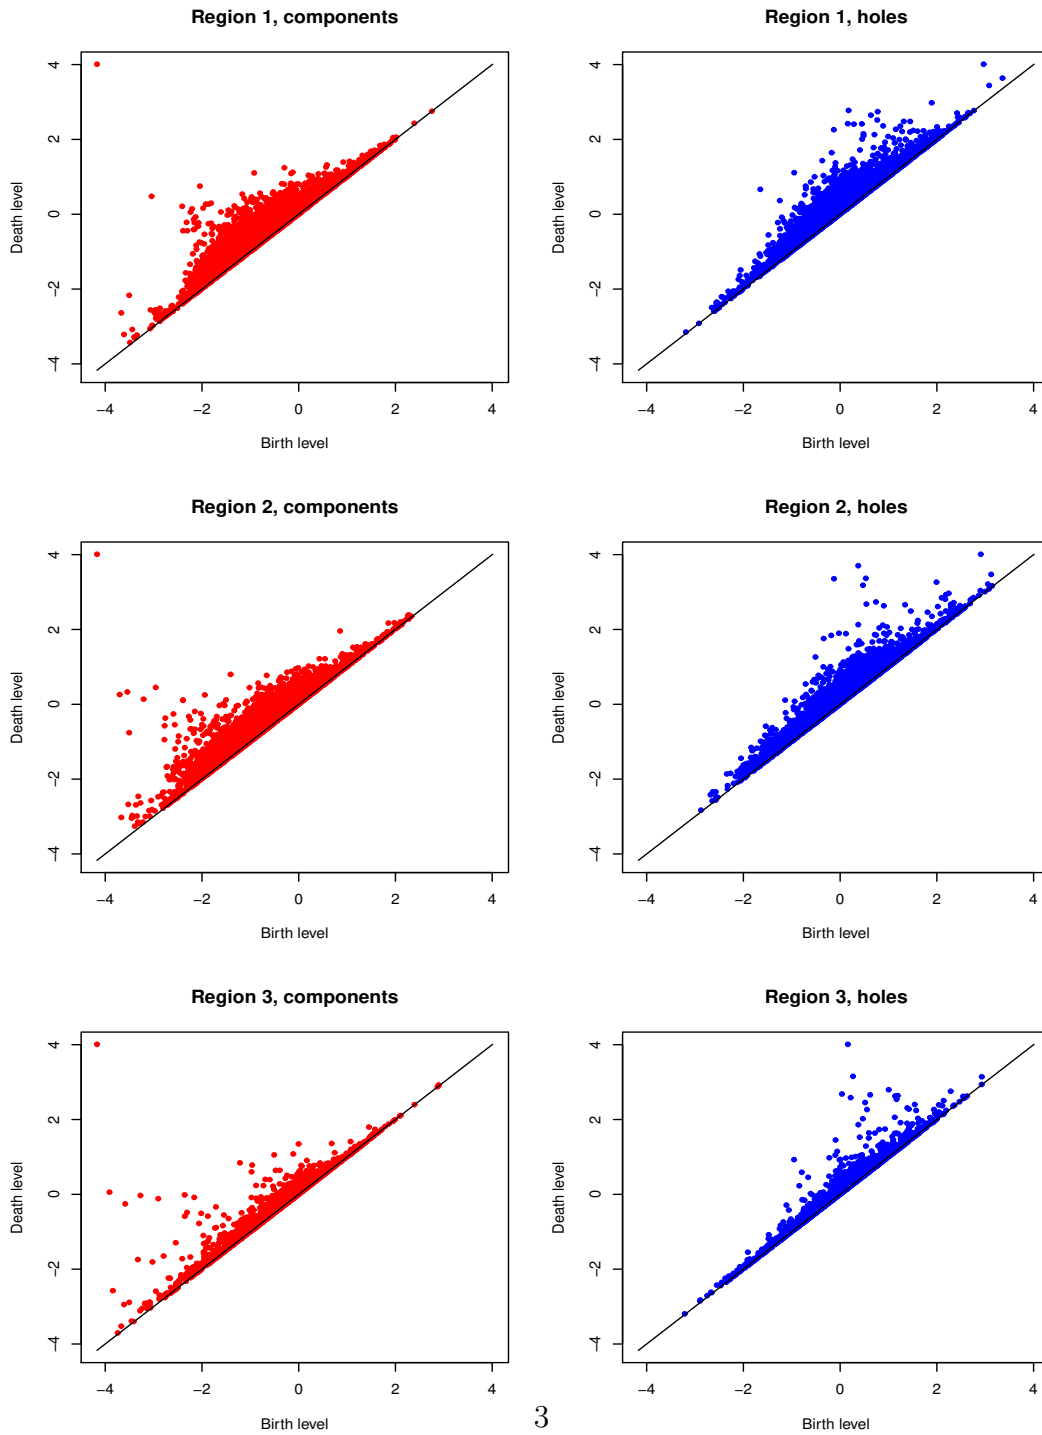

Figure 2: Persistence diagrams for GASS data regions

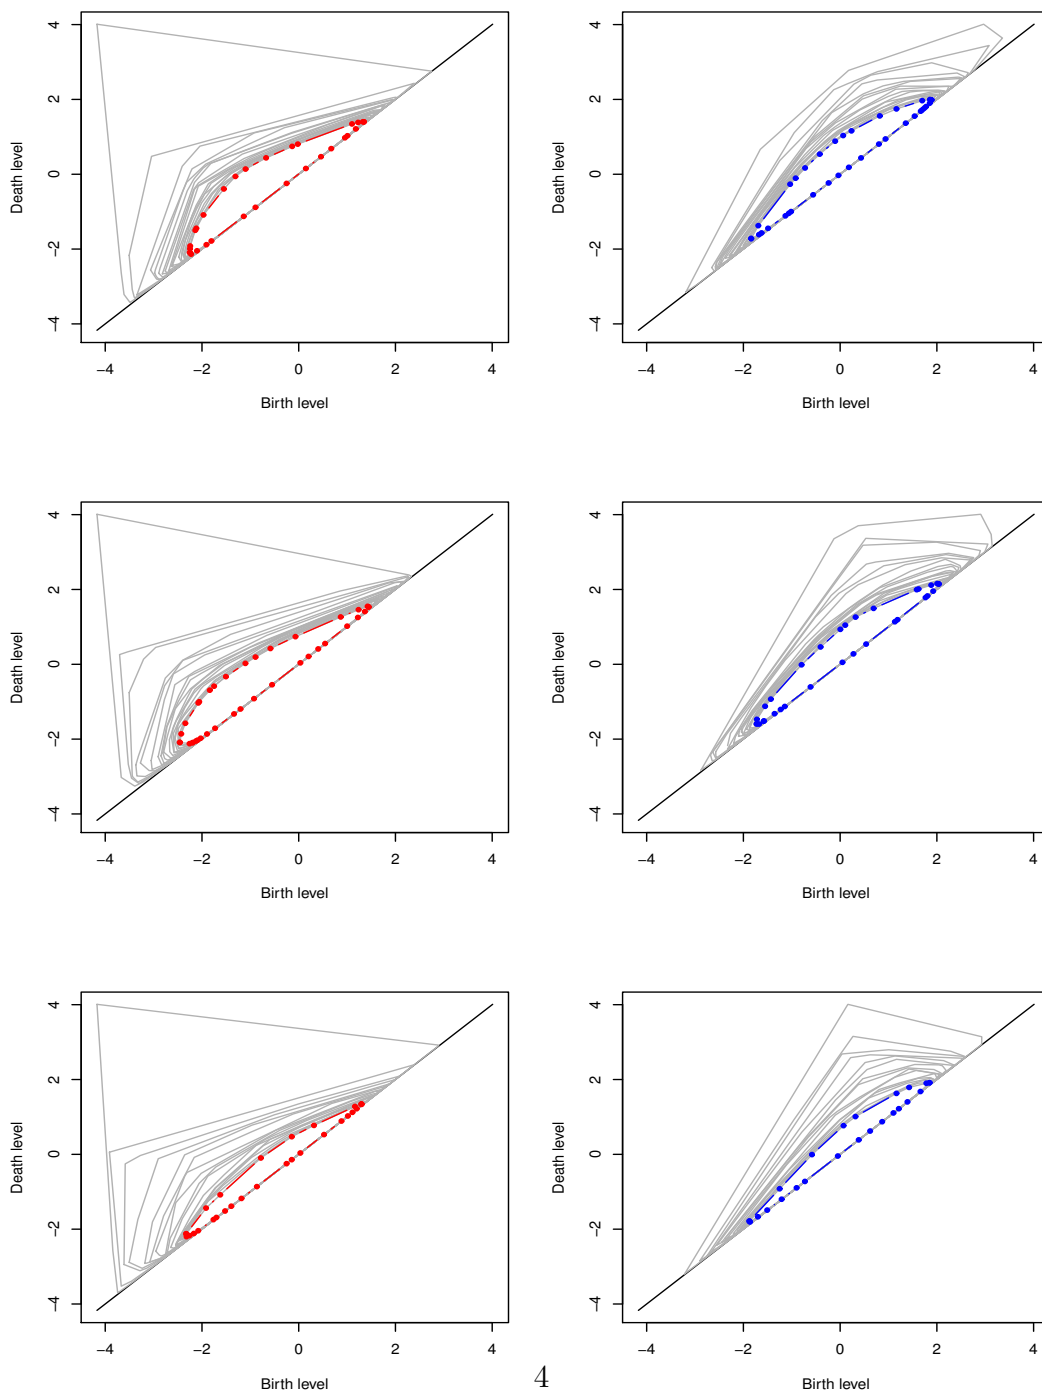

Figure 3: Convex peels for GASS data regions

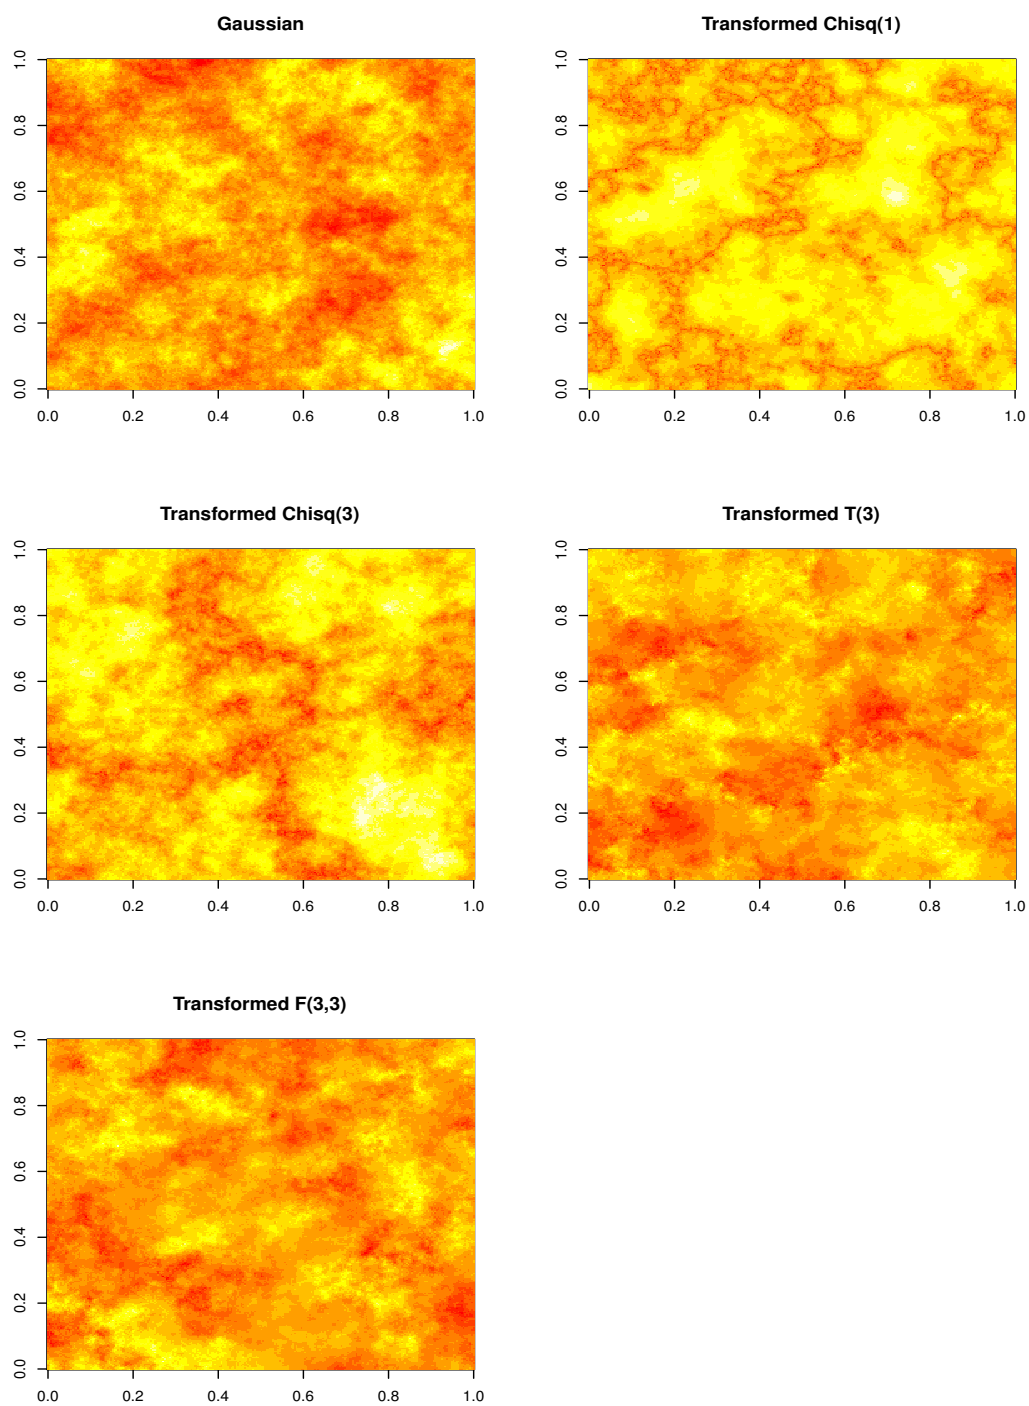

5

Figure 4: Examples of simulated data

## 2 Further simulation results

In Section 5 of the main paper we compare topologies of five different models, with (by construction) identical  $N(0,1)$  marginals and with correlation functions that are indistinguishable in practice. The first model is a Gaussian random field (GRF) with specified correlation function. The others are derived from GRFs but the constructed fields have intractable correlation functions. For comparability, we numerically searched for Matern correlation functions for the *root* GRFs that led to correlations in the *constructed* fields as close as possible to that for Model 1, with more weight on local correlations. The simulations in the paper assume exponential correlation for Model 1, based on that observed in ISM Regions 1 and 2. We repeat the construction and simulations here under the assumption that Model 1 has Matern correlation function based on that of Region 3.

Table 1: *Correlation in constructed fields compared with target correlation for Model 1: as Table 3 of main paper but with Matern correlation for Model 1, with parameters  $\nu = 1$  and  $\eta = 15$ . The Matern parameters for the Gaussian random fields underpinning the other models were estimated numerically to match the correlations in the constructed fields to Model 1. For Models 2-5 the table shows mean (and standard deviation) of estimated correlations at various lags from 50 simulations of  $256 \times 256$  random fields. For Model 1 the table shows the exact correlation.*

| Model         | $\nu$ | $\eta$ | Distance         |                  |                  |                  |                  |                  |                   |
|---------------|-------|--------|------------------|------------------|------------------|------------------|------------------|------------------|-------------------|
|               |       |        | 1                | 2                | 3                | 5                | 10               | 25               | 50                |
| 1: Gauss      | 1.00  | 15     | 0.987            | 0.959            | 0.924            | 0.841            | 0.626            | 0.208            | 0.026             |
| 2: $\chi_1^2$ | 2.32  | 25     | 0.982<br>(0.003) | 0.954<br>(0.007) | 0.920<br>(0.012) | 0.841<br>(0.022) | 0.623<br>(0.049) | 0.153<br>(0.081) | -0.008<br>(0.068) |
| 3: $\chi_3^2$ | 0.97  | 27     | 0.986<br>(0.002) | 0.956<br>(0.006) | 0.919<br>(0.010) | 0.832<br>(0.021) | 0.607<br>(0.046) | 0.179<br>(0.073) | -0.003<br>(0.063) |
| 4: $T_3$      | 1.32  | 16     | 0.988<br>(0.001) | 0.961<br>(0.003) | 0.924<br>(0.006) | 0.837<br>(0.012) | 0.613<br>(0.027) | 0.182<br>(0.044) | -0.012<br>(0.065) |
| 5: $F_{3,3}$  | 1.03  | 29     | 0.986<br>(0.002) | 0.955<br>(0.005) | 0.915<br>(0.009) | 0.824<br>(0.017) | 0.594<br>(0.035) | 0.175<br>(0.056) | 0.001<br>(0.053)  |

With these root GRFs and constructed correlations, the nonparametric topological test sizes and power are estimated in the next table. Compared with Table 4 of the main paper, Model 3 is closer to Model 1 but further from Models 4 and 5. Test sizes are all good and in the main power is high.

Table 2: *As Table 4 of main paper but with correlation parameters as obtained above. The table gives test sizes and power estimates for nonparametric comparison between pairs of  $256 \times 256$  random fields. Each value is obtained from 500 simulated pairs, using 5% overall tests after Bonferonni adjustment.*

|            | Gauss | $\chi_1^2$ | $\chi_3^2$ | $T_3$ | $F_{3,3}$ |
|------------|-------|------------|------------|-------|-----------|
| Gauss      | 0.042 | 1.000      | 0.188      | 1.000 | 0.970     |
| $\chi_1^2$ |       | 0.060      | 1.000      | 1.000 | 1.000     |
| $\chi_3^2$ |       |            | 0.048      | 1.000 | 0.788     |
| $T_3$      |       |            |            | 0.048 | 1.000     |
| $F_{3,3}$  |       |            |            |       | 0.048     |

### 3 Comparison of observed component and hole counts with GRF expectations under different trend and covariance methods

The following tables compare the observed component and hole counts for the interstellar regions with expected numbers for Gaussian random fields with various correlation structures. We considered five different methods of removing trend from the interstellar data prior to topological analysis:

1. No trend removal at all.
2. A 4th order polynomial approach, using all terms of the form  $b^i l^j$  with  $i + j \leq 4$ . Here  $b$  is galactic latitude and  $l$  is galactic longitude.
3. A higher order polynomial, as above but with  $i + j \leq 7$ .
4. A thin plate smoothing spline (TPSS) fit, with automatic smoothing parameter selection, as implemented in the `mgcv` R package.
5. As above but with higher order penalty (10 instead of the default 2).

We obtained the GRF expectations under five different correlation structures:

1. Fitting a Matern model to empirical correlations up to a separation of 70 grid units (long range Matern).
2. Fitting a Matern only to the local correlations, to separation 3 grid units (short range Matern).
3. Using empirically estimated local correlations, assuming stationarity and isotropy (Empirical: iso).
4. Using empirically estimated local correlations, assuming stationarity but not isotropy (Empirical: aniso).

5. Using empirically estimated local correlations, without assuming stationarity or isotropy (Empirical: nonstat).

For the non-stationarity results, we subdivided each field into 16 sub-regions and estimated the correlations empirically within each of these.

Results are given below for each region separately. If empirical correlations are used then the results are relatively insensitive to method of removing trend.

#### Region 1

Observed and expected counts

|                     | No trend | Low poly | High poly | TPSS   | TPSS-flexible |
|---------------------|----------|----------|-----------|--------|---------------|
| Observed components | 5175     | 5201     | 5185      | 5189   | 5172          |
| Observed holes      | 5081     | 5100     | 5145      | 5153   | 5125          |
| Long range Matern   | 8841.8   | 7350.3   | 6305.1    | 6282.2 | 5890.1        |
| Short range Matern  | 7663.9   | 6642.9   | 6715.0    | 6815.4 | 6677.7        |
| Empirical: iso      | 5367.5   | 4965.3   | 5077.4    | 5121.0 | 5076.8        |
| Empirical: aniso    | 5371.7   | 4965.6   | 5079.5    | 5122.3 | 5077.6        |
| Emirical: non-stat  | 5215.4   | 5072.6   | 5157.9    | 5189.5 | 5131.7        |

Standard deviations

|                    | No trend | Low poly | High poly | TPSS | TPSS-flexible |
|--------------------|----------|----------|-----------|------|---------------|
| Long range Matern  | 66.2     | 65.6     | 64.2      | 64.2 | 63.3          |
| Short range Matern | 66.1     | 64.9     | 64.7      | 64.9 | 64.5          |
| Empirical: iso     | 48.4     | 49.9     | 49.8      | 49.7 | 49.9          |
| Empirical: aniso   | 50.3     | 50.0     | 49.9      | 50.0 | 49.9          |
| Emirical: non-stat | 51.5     | 51.2     | 51.3      | 51.3 | 51.3          |

## Region 2

Observed and expected counts

|                     | No trend | Low poly | High poly | TPSS   | TPSS-flexible |
|---------------------|----------|----------|-----------|--------|---------------|
| Observed components | 5092     | 5103     | 5086      | 5124   | 5070          |
| Observed holes      | 5050     | 5095     | 5091      | 5115   | 5054          |
| Long range Matern   | 9209.5   | 5738.6   | 3665.6    | 3248.6 | 2825.6        |
| Short range Matern  | 7132.7   | 6968.6   | 6578.5    | 6612.1 | 6501.8        |
| Empirical: iso      | 5358.0   | 5341.8   | 5132.4    | 5146.8 | 5123.6        |
| Empirical: aniso    | 5358.2   | 5339.4   | 5130.4    | 5144.3 | 5121.4        |
| Emirical: non-stat  | 5215.3   | 5160.5   | 5007.7    | 5065.5 | 4963.2        |

Standard deviations

|                    | No trend | Low poly | High poly | TPSS | TPSS-flexible |
|--------------------|----------|----------|-----------|------|---------------|
| Long range Matern  | 66.0     | 63.7     | 56.4      | 54.2 | 51.3          |
| Short range Matern | 65.7     | 65.4     | 64.8      | 64.8 | 64.5          |
| Empirical: iso     | 50.6     | 50.9     | 51.0      | 51.0 | 51.1          |
| Empirical: aniso   | 48.1     | 48.4     | 48.9      | 48.9 | 48.9          |
| Emirical: non-stat | 49.9     | 50.0     | 50.8      | 50.2 | 50.7          |

### Region 3

Observed and expected counts

|                     | No trend | Low poly | High poly | TPSS   | TPSS-flexible |
|---------------------|----------|----------|-----------|--------|---------------|
| Observed components | 3840     | 3831     | 3676      | 3831   | 3725          |
| Observed holes      | 3694     | 3661     | 3519      | 3700   | 3565          |
| Long range Matern   | 6709.4   | 2570.9   | 1833.3    | 1229.6 | 930.3         |
| Short range Matern  | 6719.8   | 3411.8   | 2964.5    | 3428.2 | 2987.8        |
| Empirical: iso      | 4883.7   | 2835.2   | 2603.9    | 2965.4 | 2650.2        |
| Empirical: aniso    | 4879.7   | 2843.8   | 2613.1    | 2976.4 | 2662.6        |
| Emirical: non-stat  | 4069.4   | 3125.8   | 2933.3    | 3295.2 | 2976.3        |

Standard deviations

|                    | No trend | Low poly | High poly | TPSS | TPSS-flexible |
|--------------------|----------|----------|-----------|------|---------------|
| Long range Matern  | 65.5     | 50.6     | 43.5      | 36.5 | 31.9          |
| Short range Matern | 65.5     | 55.9     | 52.8      | 55.5 | 52.6          |
| Empirical: iso     | 49.9     | 48.3     | 47.2      | 49.1 | 47.5          |
| Empirical: aniso   | 50.5     | 48.7     | 47.4      | 49.1 | 47.6          |
| Emirical: non-stat | 50.1     | 47.9     | 47.8      | 48.9 | 47.9          |

## 4 P-values for comparisons between regions under different trend models

The following tables are as Table 6 of the main paper, but using each of the five trend removal methods summarised above. These results do not rely on any assumptions about the correlation structure.

We see no evidence of differences between Region 1 and Region 2, but strong evidence that Region 3 differs from the other regions in numbers of components and in both numbers and filamentarity for holes.

### Region 1 v Region 2

|               | Comps-filam | Comps-number | Holes-filam | Holes-number |
|---------------|-------------|--------------|-------------|--------------|
| No trend      | 0.730       | 0.860        | 0.666       | 1.000        |
| Low poly      | 0.387       | 1.000        | 0.863       | 0.863        |
| High poly     | 0.605       | 1.000        | 0.931       | 0.860        |
| TPSS          | 0.931       | 0.860        | 0.666       | 0.730        |
| TPSS-flexible | 0.863       | 0.931        | 0.931       | 0.895        |

### Region 1 v Region 3

|               | Comps-filam | Comps-number | Holes-filam | Holes-number |
|---------------|-------------|--------------|-------------|--------------|
| No trend      | 0.796       | 0.017        | 0.666       | 0.050        |
| Low poly      | 0.077       | 0.019        | 0.019       | 0.027        |
| High poly     | 0.863       | 0.008        | 0.014       | 0.013        |
| TPSS          | 0.796       | 0.027        | 0.094       | 0.040        |
| TPSS-flexible | 0.387       | 0.009        | 0.050       | 0.012        |

Region 2 v Region 3

|               | Comps-filam | Comps-number | Holes-filam | Holes-number |
|---------------|-------------|--------------|-------------|--------------|
| No trend      | 0.931       | 0.031        | 0.605       | 0.063        |
| Low poly      | 0.222       | 0.024        | 0.031       | 0.017        |
| High poly     | 0.863       | 0.006        | 0.136       | 0.006        |
| TPSS          | 0.796       | 0.019        | 0.340       | 0.030        |
| TPSS-flexible | 0.796       | 0.006        | 0.050       | 0.007        |
